# Supplementary material for: Quality of the delivery services in health facilities in Northern Ethiopia
Source: BMC Health Serv Res. 2017 Mar 9;17:187. doi: 10.1186/s12913-017-2125-3 (PMC5345168; doi:10.1186/s12913-017-2125-3)
Supplement: Additional file 1: — Excel file showing the details scores for the three quality components. (XLS 60 kb) [file 12913_2017_2125_MOESM1_ESM.xls]

## Sheet: Input quality items
	Delivery services INPUT quality components in health facilities, Northern Ethiopia	Number of facility	Percent
1	Stetscope available and functional	32	100
2	Baby weight scale available and functional	32	100
3	Folly catheter available	32	100
4	Fetescope available and functional	31	96.9
5	At least two delivery set readiness	31	96.9
6	IV set and canula available	31	96.9
7	Blood pressure apparatus available and functional	30	93.8
8	Container for infection prevention prepared and available	30	93.8
9	HIV test kit available and functional	30	93.8
10	IV fluid (normal saline) available	30	93.8
11	Oxytocin available	30	93.8
12	Emergency anticonvulsant (MgSo4) available	29	90.6
13	Sterilizer available and functional	28	87.5
14	Blank partograph available	28	87.5
15	Resuscitation material for newborn available ad readiness	28	87.5
16	Thermometer available and functional	27	84.4
17	Vacuum extractor available and functional	27	84.4
18	Movable delivery light available and functional	25	78.1
19	Emergency antihypertensive drug (hydralizine) available	25	78.1
20	Teracycle eye ointment available	25	78.1
21	24 hour service available	24	75
22	Vitamin K available	24	75
23	Laboratory service available and functional	23	71.9
24	Does the facility have water available today	21	65.6
25	Reliable electric power available	21	65.6
26	Refrigerator available and functional	21	65.6
27	Personal protective available	20	62.5
28	Emergency antibiotics available	20	62.5
29	Transport service available and functional	19	59.4
30	All service provider at delivery room received training to manage obstetric emergency	18	56.3
31	Episiotomy set available	17	53.1
32	Service provider preparedness (available at facility, dressed and prepared material for delivery)	17	53.1
33	Midwifery number standard per national guideline (3 in HC and 13 in hospital )	16	50
34	Number of rooms at maternity three or more	13	40.6
35	Radiant warmer available and functional	12	37.5
36	Functional toilet and shower at maternity service	11	34.4
37	Antiseptic solution available	5	15.6
38	At least two cloth/towel to dry or warp baby after birth available	5	15.6
39	Facility have a working phone or shortwave radio	4	12.5
40	All service provider at delivery room received training to do newborn resuscitation	4	12.5

## Sheet: Process quality items
	Delivery services process quality components in health facilities, Northern Ethiopia	Number of facility	Percent
1	Carefully inserts two fingers of the exam hand during vaginal examination	30	93.75
2	Tells the woman that she will receive an injection and administers oxytocin immediately after birth	30	93.75
3	Service provider ask mother Name during admission	29	90.625
4	Service provider ask mother age during admission	29	90.625
5	Assess cervical examination during first stage of labour	29	90.625
6	Dries baby vigorously and changes wet towel for a clean dry one immediately after birth	29	90.625
7	Disposes of medical waste in a plastic container with a plastic line after birth	29	90.625
8	Auscultates foetal heart rate	28	87.5
9	Weight the baby	28	87.5
10	Provide emotional support to woman during labour and delivery	27	84.375
11	Holds the baby by the trunk & places the baby on a clean dry towel	27	84.375
12	Cuts/clamps the umbilical cord using sterile scissors under gauze	27	84.375
13	Mother and newborn kept in same room after delivery	27	84.375
14	Service provider ask mother number of previous pregnancies/births	26	81.25
15	Massage the uterus with one hand one sterile cloth over the abdomen during third stage of labour	26	81.25
16	Discards the placenta in a leak-proof container with a plastic liner	26	81.25
17	Disposes needle & siring in a puncture-resistance container	26	81.25
18	Upon contraction, applies firm & sustained downward traction during third stage of labour	25	78.125
19	Service provider ask mother HIV status	24	75
20	Measures blood pressure during first stage of labour	24	75
21	Has the delivery pack and other essential material ready to assist delivery	24	75
22	Palpate the mother's abdomen to rule-out the presence of a second baby	24	75
23	Maintain firm traction on the cord and waits for the uterus to contract	24	75
24	With both hands, assists in the expulsion of the placenta by turning it over in the hands	24	75
25	Service provider ask mother other general medical problems during admission	23	71.875
26	Service provider ask mother use of medications during admission	23	71.875
27	Puts sterile double gloves on hands to conduct delivey	23	71.875
28	Allow the woman to have her preference companion at labour room	23	71.875
29	Checks to see whether the placenta is complete	23	71.875
30	Observe breast feeding initiated within the first hour after birth	23	71.875
31	Places all reusable instruments in a 0.5% chlorine solution for 10 minutes	23	71.875
32	Assess baby's breathing condition and breastfeeding	23	71.875
33	Service provider ask mother any complications during labour and postpartum period	22	68.75
34	Puts sterile gloves on both hands during physical examination	22	68.75
35	Uses sterile gloves when performing vaginal examination	22	68.75
36	Performs limited vaginal examination (every four hours)	22	68.75
37	Repeats control cord traction during contraction while simultaneously applying counter traction above pubis	22	68.75
38	Make sure that the woman is comfortable	22	68.75
39	Puts the soiled linen in a leak-proof container	22	68.75
40	Curtain to separate the women from others at least during examination	21	65.625
41	Ties or clamps cord when pulsations stop, or by 2-3 minutes after birth	21	65.625
42	Place the other hand on the women's symphysis pubis during active management of third stage of labour	21	65.625
43	If the cotrolled cord traction maneuver does not provide immediate results, stops applying	21	65.625
44	Ensures that the baby is well covered	21	65.625
45	At least once encourage the woman to take light food or drink fluid	20	62.5
46	Assess vaginal bleeding after birth	20	62.5
47	Records the information on clinical history chart after examination during admission	19	59.375
48	Assess position during first stage of labour	19	59.375
49	Records all information on the clinical records the progress during first stage of labour	19	59.375
50	Estimate gestational age using last menstrual period	18	56.25
51	Assesses station of presenting part	18	56.25
52	At least once encourage the woman to change position according to the desire and comfort	18	56.25
53	Assists the woman with breastfeeding	18	56.25
54	if the baby is breathing normally, passes the baby to mother for skin to skin contact	17	53.125
55	Responds to mothers immediate needs (thirst, hunger, cold/hot)	16	50
56	Providers ask mother whether she feels the baby's movements during admission	16	50
57	Respond to the woman/companion questions politely & in respectful manner	16	50
58	Determines foetal lie and presentation	16	50
59	Evaluates uterine contractions during first stage of labour	16	50
60	Encouraged the mother to empty her bladder	16	50
61	Checked blood pressure during immediate postpartum period before discharge	16	50
62	Record women's clinical information and reports any abnormalities after birth	16	50
63	Greeted the woman and her companion (if present) in a cordial manner during admission	15	46.875
64	Provided tetracycline eye ointment 1% prophylaxis to newborn	15	46.875
65	Administered vitamin K to newborn	15	46.875
66	Provider ask mother how frequently labour are occurring during admission	14	43.75
67	Identified degree of decent by abdominal palpation	13	40.625
68	Assessed molding	13	40.625
69	Did not rupture of membranes routinely during second stage of labour	13	40.625
70	Encourage woman to walk around during first stage of labour	13	40.625
71	Recorded the time of birth on partograph	13	40.625
72	Checked uterine contraction after birth	13	40.625
73	Service provider ask mother when the painful regular contractions began	12	37.5
74	If membranes ruptured: asked when, what color and what smell it had	11	34.375
75	Encouraged the woman to ask questions	11	34.375
76	Asked if the women experienced vaginal bleeding, fever, severe headaches, blurred vision	10	31.25
77	Providers washed hands after conducting birth with running water and soap for 10-15 seconds & dried	10	31.25
78	Asked the woman if she has urinated & encouraged her to do so	10	31.25
79	Measured fundal height	8	25
80	Used partograph to follow progress of labour	8	25
81	Cleansed the vulva with antiseptic solution before performing vaginal examination	8	25
82	Removed gloves after being immersed in 0.5% chlorine solution after conducting delivery	8	25
83	Washes hands after examining mother during admission with running water & soap for 10-15 seconds & dries	7	21.875
84	Checked temperature during admission/ first stage of labour	7	21.875
85	Providers washed hands prior to conducting delivery with running water and soap	7	21.875
86	Explain each procedure to the mother	6	18.75
87	Determine pulse rate during admission/first stage of labour	6	18.75
88	Gloves are removed after being immersed in 0.5% chlorine solution after performing each vaginal examination	6	18.75
89	Checked bladder distension after birth	6	18.75
90	Mother health condition checked during immediate postpartum periods before discharge	6	18.75
91	Determined respiratory rate during admission/ first stage of labour	4	12.5
92	Determine pulse rate during immediate postpartum period before discharge	3	9.375

## Sheet: Output quality items
	Delivery services Output quality components [Satisfaction score at facility level (26 items) and EmONC utilization in the past 3 months (9 items)] in health Faacilities, Northern Ethiopia	Number of facility	Percent
1	Cost of transportation from home to facility affordable	32	100
2	Fees charged at facility affordable	32	100
3	Pregnant women cared at facility recovered well	32	100
4	Doctors and midwives examine mother very well	32	100
5	Doctors and midwives suited to provide delivery care	32	100
6	Currently received good care	32	100
7	satisfied with waiting time in the facility	32	100
8	Doctors and midwives at facility available	31	96.875
9	Medicine supplied in the facility is good	31	96.875
10	Cleanliness of facility is good	31	96.875
11	Opening hours of the facility is suitable	30	93.75
12	Doctors and midwives openly discuss with mothers	30	93.75
13	Doctors and midwives respectful to mothers	30	93.75
14	Time the doctors and midwives devote is adequate	30	93.75
15	Equipment is adequate for detecting diseases related to pregnancy, labour and delivery	29	90.625
16	Doctors and midwives compassionate towards pregnant women	29	90.625
17	Obtain drugs at facility easily	27	84.375
18	Good expectation toward quality care given at the facility	27	84.375
19	Transport from home to health facility not difficult	26	81.25
20	Adequate number of doctors and midwives available at this facility	26	81.25
21	Adequate waiting rooms, examination rooms and delivery rooms available	25	78.125
22	Facility utilized manual removal of placenta within three months prior to study	22	68.75
23	Distance from home to this facility is short	21	65.625
24	Doctors and midwives involved mothers in decision making	21	65.625
25	Facility utilized removal of retained product within three months prior to study	21	65.625
26	Facility utilized parenteral oxytocine within three months prior to study	20	62.5
27	Facility utilized assisted vaginal delivery within three months prior to study	19	59.375
28	Facility utilized parenteral antibiotics within three months prior to study	18	56.25
29	Adequate privacy is given during childbirth and examination	17	53.125
30	Facility utilized parenteral anticonvulsant within three months prior to study	11	34.375
31	Facility utilized cesarean delivery within three months prior to study	9	28.125
32	Facility utilized newborn resuscitation within three months prior to study	6	18.75
33	Facility utilized blood transfusion within three months prior to study	5	15.625
34	People who work in the facility are very honest	2	6.25
35	Doctors and midwives at facility are fully capable of finding out the problem with a pregnancy, labour and delivery	2	6.25
