# Supplementary material for: Quality of the delivery services in health facilities in Northern Ethiopia
Source: Springer Nature journal article supplement (doi:10.1186/s12913-017-2125-3), 2017-03-09
Supplement: MOESM2 [file 12132056]

**Additional file 2:** Showing the copies of interview and observation guides used in measuring input (Table 1), process (Table 2) and output (Table 3 and 4) quality delivery service in Northern Ethiopia study.

**Table 1:** Checklist used in measuring input quality delivery service in the Northern Ethiopia

| Input variables (yes/no question )                                                                                                                             | Response(observed) |       |
|----------------------------------------------------------------------------------------------------------------------------------------------------------------|--------------------|-------|
| <b>Infrastructures indicators</b>                                                                                                                              |                    |       |
| 1. Clean water source available                                                                                                                                | 1. Yes             | 2. No |
| 2. Reliable electricity available                                                                                                                              | 1. Yes             | 2. No |
| 3. Means of communication available all times even not locked                                                                                                  | 1. Yes             | 2. No |
| 4. 24 hour service available                                                                                                                                   | 1. Yes             | 2. No |
| 5. Functioning transport facilities (Ambulance) available                                                                                                      | 1. Yes             | 2. No |
| 6. At least three rooms available for maternity service                                                                                                        | 1. Yes             | 2. No |
| 7. Functional refrigerator for storage of drugs and vaccines available                                                                                         | 1. Yes             | 2. No |
| 8. Mother toilet with shower service available                                                                                                                 | 1. Yes             | 2. No |
| <b>Basic equipments and supplies in the delivery room</b>                                                                                                      |                    |       |
| 1. Functional Blood pressure apparatus available                                                                                                               | 1. Yes             | 2. No |
| 2. Functional Oral or axillary Thermometer available                                                                                                           | 1. Yes             | 2. No |
| 3. Functional Stethoscope available                                                                                                                            | 1. Yes             | 2. No |
| 4. Functional Fetal stethoscope available                                                                                                                      | 1. Yes             | 2. No |
| 5. Functional Baby weighing scales available                                                                                                                   | 1. Yes             | 2. No |
| 6. Sterilizers (autoclave or dry oven) available                                                                                                               | 1. Yes             | 2. No |
| 7. Personal protective equipments (at least mouth mask, boots, delivery gown, apron, sterile glove) available                                                  | 1. Yes             | 2. No |
| 8. Antiseptics (soap, chlorine solution, alcohol, iodine)                                                                                                      | 1. Yes             | 2. No |
| 9. Container for infection prevention (decontamination container, safety box, covered contaminated waste bin) available                                        | 1. Yes             | 2. No |
| 10. Functional movable delivery light available                                                                                                                | 1. Yes             | 2. No |
| 11. Functional Vacuum extractor available                                                                                                                      | 1. Yes             | 2. No |
| <b>Essential obstetric equipments (absolute minimum equipments for delivery)</b>                                                                               |                    |       |
| 1. Two sterilized delivery sets (cord scissors, cord tie, two artery forceps) available                                                                        | 1. Yes             | 2. No |
| 2. Episiotomy set (catgut, one tissue forceps, one needle holder, one scissor/blade) available                                                                 | 1. Yes             | 2. No |
| <b>Consumable supplies</b>                                                                                                                                     |                    |       |
| 1. IV set and Canula available                                                                                                                                 | 1. Yes             | 2. No |
| 2. Folly catheter available                                                                                                                                    | 1. Yes             | 2. No |
| 3. Blank partograph available                                                                                                                                  | 1. Yes             | 2. No |
| 4. HIV test kit available                                                                                                                                      | 1. Yes             | 2. No |
| 5. IV fluid (normal saline) available                                                                                                                          | 1. Yes             | 2. No |
| <b>Emergency drugs for maternal care available</b>                                                                                                             |                    |       |
| 1. Oxytocin drug available                                                                                                                                     | 1. Yes             | 2. No |
| 2. Antibiotics (at least Ampicillin, Gentamicin and Metrandazol) available                                                                                     | 1. Yes             | 2. No |
| 3. Anticonvulsant drugs (at least Magnisiaum sulfate(MgSo4)) available                                                                                         | 1. Yes             | 2. No |
| 4. Antihypertensive drug (Hydralazine) available                                                                                                               | 1. Yes             | 2. No |
| <b>Essential Newborn care equipments and drugs</b>                                                                                                             |                    |       |
| 1. Newborn resuscitation materials (at least Bag and mask, mucus extractors, mask) available                                                                   | 1. Yes             | 2. No |
| 2. At least two towel to dry and warp baby after delivery available                                                                                            | 1. Yes             | 2. No |
| 3. Functional incubator (enough light or radiant warmer) available                                                                                             | 1. Yes             | 2. No |
| 4. Vitamin K available                                                                                                                                         | 1. Yes             | 2. No |
| 5. Tetracycline (TTC) eye ointment available                                                                                                                   | 1. Yes             | 2. No |
| <b>Functioning Laboratory service</b>                                                                                                                          |                    |       |
| 1. Basic blood and Urine analysis test available (Hgb or Hct, WBC count, ABO blood group and Rh test, malaria and HIV tests, Urine analysis like protein urea, | 1. Yes             | 2. No |
| <b>Human resource for maternity service available</b>                                                                                                          |                    |       |
| 2. At least three midwife available at Health Center or at least 13 midwives at hospital (adequacy of SBAs)                                                    | 1. Yes             | 2. No |
| 3. Skilled birth attendance(SBAs) readiness (available and properly dressed at delivery room)                                                                  | 1. Yes             | 2. No |
| 4. All SBAs in the facility trained to manage obstetric complication                                                                                           | 1. Yes             | 2. No |
| 5. At least one SBA in the facility trained to manage neonatal resuscitation                                                                                   | 1. Yes             | 2. No |

**Table 2:** Checklist used in measuring process quality delivery service in Northern Ethiopia

| <b>Process quality variables: assessed using observation of mother during labour</b>                                                                                     | <b>Observed</b> |       |
|--------------------------------------------------------------------------------------------------------------------------------------------------------------------------|-----------------|-------|
| <b>A. During Admission:</b>                                                                                                                                              |                 |       |
| Provider greets the woman and her companion (if present) in a cordial manner                                                                                             | 1. Yes          | 2. No |
| Provider responds to mother immediate needs (thirst, hunger, cold/hot, need to urinate,                                                                                  | 1. Yes          | 2. No |
| Provider ask mothers name                                                                                                                                                | 1. Yes          | 2. No |
| Provider ask her age                                                                                                                                                     | 1. Yes          | 2. No |
| Provider ask about number of previous pregnancies/births                                                                                                                 | 1. Yes          | 2. No |
| Provider ask any complications during labour and postpartum period                                                                                                       | 1. Yes          | 2. No |
| Provider ask other general medical problems                                                                                                                              | 1. Yes          | 2. No |
| Provider ask use of medications                                                                                                                                          | 1. Yes          | 2. No |
| Provider ask about her HIV status                                                                                                                                        | 1. Yes          | 2. No |
| Provider estimate gestational age using last menstrual period                                                                                                            | 1. Yes          | 2. No |
| Provider ask mothers how frequently labour are occurring                                                                                                                 | 1. Yes          | 2. No |
| Provider ask if her membranes ruptured: when, what color and what smell it had                                                                                           | 1. Yes          | 2. No |
| Provider ask mothers whether she feels the baby's movements                                                                                                              | 1. Yes          | 2. No |
| Provider ask mothers when the painful regular contractions began                                                                                                         | 1. Yes          | 2. No |
| Provider ask mothers whether she has experienced vaginal bleeding, fever, severe headaches, blurred vision, convulsion, or if any other problems the client is concerned | 1. Yes          | 2. No |
| Provider records the information on clinical history chart                                                                                                               | 1. Yes          | 2. No |
| Ensures privacy with screen or curtain to separate the women from others at least during examination                                                                     | 1. Yes          | 2. No |
| Washes hands with running water and soap for 10-15 seconds and dries with an individual clean towel or allows hands to air dry                                           | 1. Yes          | 2. No |
| Explain each step                                                                                                                                                        | 1. Yes          | 2. No |
| At least one encourage the woman to ask questions                                                                                                                        | 1. Yes          | 2. No |
| Respond to the woman/ companion questions politely and in respectful manner                                                                                              | 1. Yes          | 2. No |
| <b>B. First stage of labour:</b>                                                                                                                                         |                 |       |
| Providers takes mother temperature                                                                                                                                       | 1. Yes          | 2. No |
| Provider takes mother pulse during admission/first stage labour                                                                                                          | 1. Yes          | 2. No |
| Provider measures mother blood pressure                                                                                                                                  | 1. Yes          | 2. No |
| Provider determines mother respiratory rate                                                                                                                              | 1. Yes          | 2. No |
| Provider measures mother fundal height                                                                                                                                   | 1. Yes          | 2. No |
| Provider determines foetal lie and presentation                                                                                                                          | 1. Yes          | 2. No |
| Provider identifies degree of decent by abdominal palpation (from five to zero fingers above the pubis)                                                                  | 1. Yes          | 2. No |
| Provider evaluates uterine contractions (frequency and duration over a 10-minute period)                                                                                 | 1. Yes          | 2. No |
| Provider Auscultates foetal heart rate (FHR)                                                                                                                             | 1. Yes          | 2. No |
| During physical examination, providers:                                                                                                                                  |                 |       |
| Puts sterile gloves on both hands                                                                                                                                        | 1. Yes          | 2. No |
| Carefully inserts two fingers of the exam hand                                                                                                                           | 1. Yes          | 2. No |
| Assess cervical examination                                                                                                                                              | 1. Yes          | 2. No |
| Assesses molding                                                                                                                                                         | 1. Yes          | 2. No |
| Assesses station of presenting part                                                                                                                                      | 1. Yes          | 2. No |
| Assesses position                                                                                                                                                        | 1. Yes          | 2. No |
| Gloves are removed after being immersed in 0.5% chlorine solution and placed in a leak-proof container                                                                   | 1. Yes          | 2. No |
| Records all information on the clinical records                                                                                                                          | 1. Yes          | 2. No |

|                                                                                                                                                                                  |        |       |
|----------------------------------------------------------------------------------------------------------------------------------------------------------------------------------|--------|-------|
| Provider start partograph to follow progress of labour                                                                                                                           | 1. Yes | 2. No |
| <b>Infection prevention practice of providers:</b>                                                                                                                               |        |       |
| Cleanse the vulva with antiseptic solution before performing vaginal examination                                                                                                 | 1. Yes | 2. No |
| Performs limited vaginal examination (e.g, every four hours or as indicated)                                                                                                     | 1. Yes | 2. No |
| Uses sterile gloves when performing vaginal examination or when in contact with body fluids                                                                                      | 1. Yes | 2. No |
| Rupture of membranes is not performed routinely                                                                                                                                  | 1. Yes | 2. No |
| <b>Provider prepares to assist the birth:</b>                                                                                                                                    |        |       |
| Has the delivery pack and other essential material and ready to assist the delivery (delivery set, episiotomy set, newborn resuscitation set, glove, delivery gown, apron, mask) | 1. Yes | 2. No |
| Prior to delivery, washes hands with running water and soap for 10-15 seconds and dries an individual clean towel or allows hands to air dry                                     | 1. Yes | 2. No |
| Puts sterile double gloves on hands                                                                                                                                              | 1. Yes | 2. No |
| <b>Provider:</b>                                                                                                                                                                 |        |       |
| At least once encourage woman to walk around                                                                                                                                     | 1. Yes | 2. No |
| At least once encourage the woman to change position according to the desire and comfort                                                                                         | 1. Yes | 2. No |
| At least once encourage the woman to take light food or drink fluid in labour                                                                                                    | 1. Yes | 2. No |
| Allow the woman to have her preference companion at labour room                                                                                                                  | 1. Yes | 2. No |
| Provide emotional support to woman during labour and delivery                                                                                                                    | 1. Yes | 2. No |
| At least once encourages her to empty her bladder                                                                                                                                | 1. Yes | 2. No |
| <b>C. Second stage of labour: provider</b>                                                                                                                                       |        |       |
| Holds the baby by the trunk and places the baby on a clean dry towel on the mother's abdomen                                                                                     | 1. Yes | 2. No |
| Dries baby vigorously and changes wet towel for a clean dry one                                                                                                                  | 1. Yes | 2. No |
| Ties or clamps cord when pulsations stop, or by 2-3 minutes after birth (no immediately after birth)                                                                             | 1. Yes | 2. No |
| Cuts/clamps the umbilical cord using sterile scissors under gauze to prevent blood spurting                                                                                      | 1. Yes | 2. No |
| If the baby is breathing normally, passes the baby to mother for skin-to-skin contact on breast                                                                                  | 1. Yes | 2. No |
| Note the time of birth and records on partograph or in other records                                                                                                             | 1. Yes | 2. No |
| <b>D. Third stage of labour: provider,</b>                                                                                                                                       |        |       |
| Palpate the mother's abdomen to rule-out the presence of a second baby                                                                                                           | 1. Yes | 2. No |
| Tells the woman that she will receive an injection and administers 10 IU of oxytocin IM or 600 mcg misoprostol orally within 1 minute of delivery                                | 1. Yes | 2. No |
| Place the other hand on the women's symphysis pubis (over the sterile towel)                                                                                                     | 1. Yes | 2. No |
| Maintain firm traction on the cord and waits for the uterus to contract                                                                                                          | 1. Yes | 2. No |
| Upon contraction, applies firm and sustained downward traction on the cord with counter traction above the pubis to guard the uterus, until the placenta is expelled             | 1. Yes | 2. No |
| If this maneuver does not provide immediate results, stops applying traction, holding the cord and clamp until the next contraction                                              | 1. Yes | 2. No |
| Repeats control cord traction during contraction while simultaneously applying counter traction above pubis to guard uterus                                                      | 1. Yes | 2. No |
| With both hands, assists in the expulsion of the placenta by turning it over in the hands without applying traction twisting the membranes                                       | 1. Yes | 2. No |
| Massage the uterus with one hand one sterile cloth over the abdomen until it contracts firmly                                                                                    | 1. Yes | 2. No |
| Checks to see whether the placenta is complete (maternal and foetal sides, plus membranes, lobes)                                                                                | 1. Yes | 2. No |
| <b>E. Immediate postpartum periods: provider,</b>                                                                                                                                |        |       |
| Make sure that the woman is comfortable (clean, hydrated and warmly covered)                                                                                                     | 1. Yes | 2. No |

|                                                                                                                                                         |        |       |
|---------------------------------------------------------------------------------------------------------------------------------------------------------|--------|-------|
| Ensures that the baby is well covered                                                                                                                   | 1. Yes | 2. No |
| Administer vitamin K to newborn                                                                                                                         | 1. Yes | 2. No |
| Provides tetracycline eye ointment 1% prophylaxis to newborn                                                                                            | 1. Yes | 2. No |
| Observe breast feeding initiated within the first hour after birth                                                                                      | 1. Yes | 2. No |
| Weight the baby                                                                                                                                         | 1. Yes | 2. No |
| Mother and newborn kept in same room after delivery                                                                                                     | 1. Yes | 2. No |
| Discards the placenta in a leak-proof container with a plastic liner                                                                                    | 1. Yes | 2. No |
| Disposes of medical waste (gauze, etc) in a plastic container with a plastic liner                                                                      | 1. Yes | 2. No |
| Puts the soiled linen in a leak-proof container                                                                                                         | 1. Yes | 2. No |
| Places all reusable instruments in a 0.5% chlorine solution for 10 minutes                                                                              | 1. Yes | 2. No |
| Disposes needle and siring in a puncture-resistance container, without removing, recapping or breaking the needle                                       | 1. Yes | 2. No |
| Gloves are removed after being immersed in 0.5% chlorine solution and placed in a leak-proof container                                                  | 1. Yes | 2. No |
| Washes hands with running water and soap for 10-15seconds and dries with an individual clean towel or allows hands to air dry after conducting delivery | 1. Yes | 2. No |
| Provider monitors the mother and newborn after birth:                                                                                                   |        |       |
| Baby's breathing condition and breastfeeding during immediate postpartum period                                                                         | 1. Yes | 2. No |
| Vaginal bleeding assessed during immediate postpartum period before discharge                                                                           | 1. Yes | 2. No |
| Bladder distension assessed during immediate postpartum period before discharge                                                                         | 1. Yes | 2. No |
| Blood pressure measured during immediate postpartum period before discharge                                                                             | 1. Yes | 2. No |
| Uterine contraction assessed during immediate postpartum period before discharge                                                                        | 1. Yes | 2. No |
| Pulse of mother measured during immediate postpartum period before discharge                                                                            | 1. Yes | 2. No |
| Health condition of the mother assessed during immediate postpartum period before discharge                                                             | 1. Yes | 2. No |
| Assists the woman with breastfeeding after birth                                                                                                        | 1. Yes | 2. No |
| Asks the woman if she has urinated and encourages her to do so whenever she wishes after birth                                                          | 1. Yes | 2. No |
| Records the information on the women's clinical record and reports any abnormalities after birth                                                        | 1. Yes | 2. No |

**Table 3:** Interview guides used in measuring output quality (level of Satisfaction and EmONC utilization measures) in Northern Ethiopia study, 2015

| Output quality variables |                                                                          |                                                                                                 |
|--------------------------|--------------------------------------------------------------------------|-------------------------------------------------------------------------------------------------|
| no                       | A. Satisfaction of mother (n=216): using exit interview (total 26 items) | Response                                                                                        |
| 1                        | The distance from your home to the nearest health facility is:           | 1. Long<br>2. Quite long<br>3. Short                                                            |
| 2                        | To get transport from your home to this health facility is:              | 1. Difficult<br>2. Moderately difficult<br>3. Not at all difficult                              |
| 3                        | The cost of transportation from your home to this health facility is:    | 1. Not at all affordable<br>2. Moderately affordable<br>3. Affordable                           |
| 4                        | The fees you are charged at this health facility is:                     | 1. Not at all affordable<br>2. Moderately affordable<br>3. Affordable                           |
| 5                        | The opening hours at of this health facility is:                         | 1. Not at all Suitable<br>2. Moderately suitable<br>3. Suitable                                 |
| 6                        | The doctors and midwives at this health facility are:                    | 1. Not at all available<br>2. Moderately available<br>3. Available                              |
| 7                        | The people who work in this health facility are:                         | 1. Not very honest<br>2. Fairly honest<br>3. Honest                                             |
| 8                        | The doctors and midwives are Capable;                                    | 1. Not capable of finding out the problem with a pregnancy<br>2. Fairly capable<br>3. Incapable |
| 9                        | How you obtain drugs:                                                    | 1. With difficulty<br>2. With relative ease<br>3. Easily                                        |
| 10                       | The effectiveness of the medicine supplied by this facility is:          | 1. Not good<br>2. Fair<br>3. Good                                                               |
| 11                       | The equipment is Adequate;                                               | 1. Inadequate for detecting diseases related to pregnancy<br>2. More or less adequate           |
| 12                       | The waiting rooms, examination rooms and delivery rooms are:             | 1. Inadequate<br>2. More or less adequate<br>3. Adequate                                        |
| 13                       | The pregnant women cared for:                                            | 1. Do not recover well<br>2. Recover relatively well<br>3. Recover well                         |
| 14                       | The doctors and midwives examine you:                                    | 1. Not very Well<br>2. Moderately well<br>3. Well                                               |
| 15                       | The doctors and midwives are                                             | 1. Not very open with the pregnant women<br>2. Fairly open<br>3. Open                           |
| 16                       | The doctors and midwives are                                             | 1. Not very compassionate towards pregnant women<br>2. Fairly compassionate<br>3. Compassionate |
| 17                       | The doctors and midwives are                                             | 1. Not at all respectful towards pregnant women                                                 |

|    |                                                                 |                                                                                                                           |
|----|-----------------------------------------------------------------|---------------------------------------------------------------------------------------------------------------------------|
|    |                                                                 | 2. Fairly respectful<br>3. Respectful                                                                                     |
| 18 | The time that the doctors and midwives devote you is:           | 1. Inadequate<br>2. More or less adequate<br>3. Adequate                                                                  |
| 19 | How do rate the privacy given to you during child birth         | 1. Inadequate privacy during examination by the midwife/ nurse<br>2. More or less adequate privacy<br>3. Adequate privacy |
| 20 | The number of doctors and midwives is:                          | 1. Inadequate<br>2. More or less adequate<br>3. Adequate                                                                  |
| 21 | The doctors and midwives are                                    | 1. Not well suited to deliver pregnant women<br>2. Relatively well suited<br>3. Well suited                               |
| 22 | Previous expectation toward quality care given at this facility | 1. Poor<br>2. Moderate<br>3. Good                                                                                         |
| 23 | Currently received care                                         | 1. Poor service more than expected<br>2. Moderate<br>3. Good service more than expected                                   |
| 24 | Are you satisfied with waiting time in this facility:           | 1. Un satisfied<br>2. Fairly satisfied<br>3. Very satisfied                                                               |
| 25 | Cleanliness of facility                                         | 1. Inadequate<br>2. More or less adequate<br>3. Adequate                                                                  |
| 26 | The doctors and midwives involve you in decision making:        | 1. Not involved<br>2. Moderately involved<br>3. Totally involved                                                          |

**Table 4:** Checklist used in assessing emergency obstetric and newborn care utilization in the past three months prior to study periods which is filled from maternity registers.

| <b>Facility Case Summary Form for EmONC practice (Data extraction)</b> |                                                                                                                                                                                   |              |
|------------------------------------------------------------------------|-----------------------------------------------------------------------------------------------------------------------------------------------------------------------------------|--------------|
|                                                                        | <b>B. Emergency Obstetric utilization past 3 months prior to study periods: using record review Yes/no questions using record review at health facility (n=32); total 9 items</b> |              |
| 1                                                                      | Parenteral antibiotics administered                                                                                                                                               | 1. Yes 2. No |
| 2                                                                      | Parenteral oxytocin administered                                                                                                                                                  | 1. Yes 2. No |
| 3                                                                      | Parenteral anticonvulsants administered                                                                                                                                           | 1. Yes 2. No |
| 4                                                                      | Manual removal of placenta done                                                                                                                                                   | 1. Yes 2. No |
| 5                                                                      | Removal of retained products (e.g., manual vacuum aspiration) done                                                                                                                | 1. Yes 2. No |
| 6                                                                      | Assisted vaginal delivery (e.g., vacuum extraction, breech delivery) done                                                                                                         | 1. Yes 2. No |
| 7                                                                      | Newborn resuscitation done                                                                                                                                                        | 1. Yes 2. No |
| 8                                                                      | Blood transfusion done                                                                                                                                                            | 1. Yes 2. No |
| 9                                                                      | Caesarian delivery (operative delivery) conducted                                                                                                                                 | 1. Yes 2. No |
